# Supplementary material
Source: PubMed Central journal article supplement (PMC3885247)
Supplement: NIHMS529430-supplement-supplemental_information.pdf [file NIHMS529430-supplement-supplemental_information.pdf]

**N9-Substituted 2,4-Diaminoquinazolines: Synthesis and Biological Evaluation of Lipophilic Inhibitors of *Pneumocystis carinii* and *Toxoplasma gondii* Dihydrofolate Reductase.**

Aleem Gangjee,<sup>\*†</sup> Ona O. Adair,<sup>†</sup> Michelle Pagley,<sup>†</sup> Sherry F. Queener<sup>‡</sup>

Supporting Information

Table 2: Elemental analysis data for compounds **5-13**

## Supplemental Information

**Table 2:** Elemental analysis data for compounds **5-13**.

|           | <b>Formula</b>                                                                      | <b>Mw<br/>Calc.</b> | <b>Mw<br/>Found</b> | <b>%C<br/>Calc.</b> | <b>%C<br/>Found</b> | <b>%H<br/>Calc.</b> | <b>%H<br/>Found</b> | <b>%N<br/>Calc.</b> | <b>%N<br/>Found</b> | <b>%Cl<br/>Calc.</b> | <b>%Cl<br/>Found</b> |
|-----------|-------------------------------------------------------------------------------------|---------------------|---------------------|---------------------|---------------------|---------------------|---------------------|---------------------|---------------------|----------------------|----------------------|
| <b>5</b>  | C <sub>17</sub> H <sub>19</sub> N <sub>5</sub> ·1.8HCl·0.6CH <sub>3</sub> OH        | 293.4               | 378.2271            | 69.6                | 55.89               | 6.5                 | 6.18                | 23.9                | 18.52               |                      |                      |
| <b>6</b>  | C <sub>21</sub> H <sub>21</sub> N <sub>5</sub> ·1.5HCl                              | 343.5               | 398.1233            | 73.4                | 63.35               | 6.2                 | 5.70                | 20.4                | 17.59               |                      |                      |
| <b>7</b>  | C <sub>21</sub> H <sub>21</sub> N <sub>5</sub> ·1.0HCl                              | 343.5               | 379.8928            | 73.4                | 66.40               | 6.2                 | 5.84                | 20.4                | 18.44               |                      |                      |
| <b>8</b>  | C <sub>19</sub> H <sub>23</sub> N <sub>5</sub> O <sub>2</sub> ·0.7H <sub>2</sub> O  | 353.5               | 366.0353            | 64.6                | 62.35               | 6.6                 | 6.72                | 19.8                | 19.13               |                      |                      |
| <b>9</b>  | C <sub>17</sub> H <sub>16</sub> N <sub>5</sub> Cl <sub>3</sub> ·0.3H <sub>2</sub> O | 396.7               | 402.1116            | 51.5                | 50.78               | 4.1                 | 4.16                | 17.7                | 17.42               | 26.8                 | 26.45                |
| <b>10</b> | C <sub>20</sub> H <sub>25</sub> N <sub>5</sub> O <sub>2</sub> ·0.5H <sub>2</sub> O  | 367.5               | 376.882             | 65.4                | 63.70               | 6.9                 | 6.79                | 19.1                | 18.38               |                      |                      |
| <b>11</b> | C <sub>22</sub> H <sub>23</sub> N <sub>5</sub> ·0.3H <sub>2</sub> O                 | 357.5               | 362.8634            | 73.9                | 72.70               | 6.5                 | 6.32                | 19.6                | 19.38               |                      |                      |
| <b>12</b> | C <sub>21</sub> H <sub>25</sub> N <sub>5</sub> O <sub>2</sub> ·0.6H <sub>2</sub> O  | 379.5               | 390.2717            | 66.4                | 64.30               | 6.6                 | 6.44                | 18.4                | 18.03               |                      |                      |
| <b>13</b> | C <sub>23</sub> H <sub>23</sub> N <sub>5</sub> ·1.1H <sub>2</sub> O                 | 369.5               | 389.2867            | 74.8                | 70.83               | 6.3                 | 6.21                | 18.9                | 17.77               |                      |                      |
